# Supplementary material
Source: Springer Nature journal article supplement (https://www.springermedizin.de/resource/supplementary/13058_2011_2910_MOESM12_ESM.pdf/9702774)

**A**

99 16 12 19 31 96 88 90 34

 $P = 7 \times 10^{-30}$ 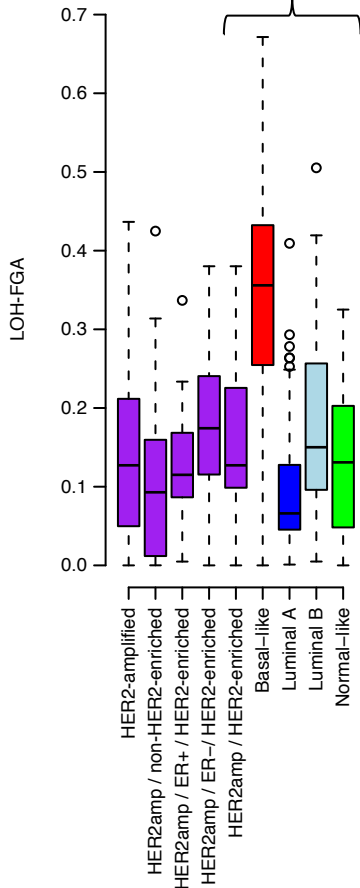**B**

99 16 12 19 31 96 88 90 34

 $P = 4 \times 10^{-10}$ 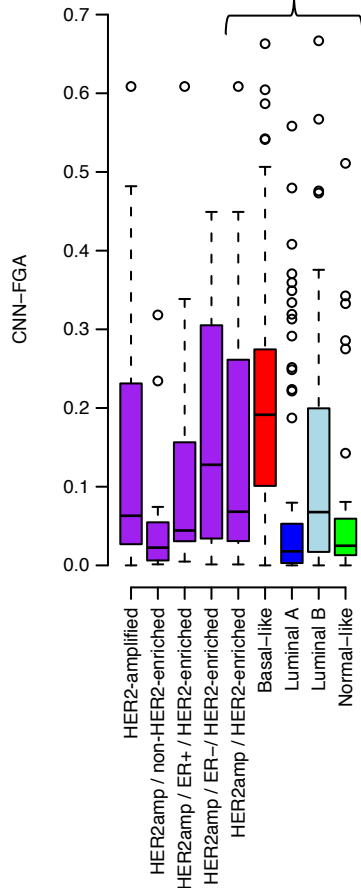

Supplement: MOESM12 [file 9702774]
